# Supplementary material for: Binding-induced functional-domain motions in the Argonaute characterized by adaptive advanced sampling
Source: PLOS journal article supplement (doi:10.1371/journal.pcbi.1009625), 2021-11-29
Supplement: S2 (10.1371/journal.pcbi.1009625.s002) [file journal.pcbi.1009625.s002]

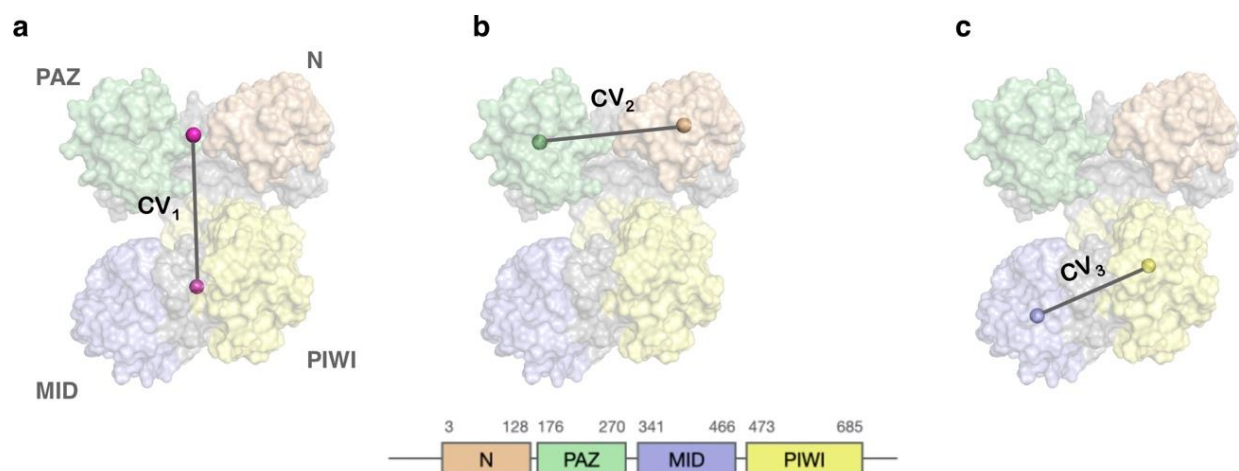

**S2\_Fig.** Three center-of-mass (COM) distances served as collective variables. Each CV was independently biased by a potential to promote domain motions. The CVs were defined as the distance between centers-of mass of the two lobes (**a**), PAZ & N (**b**), and MID & PIWI (**c**).
